# Supplementary material for: Crystal structure dependent cation exchange reactions in Cu2−xS nanoparticles
Source: Royal Society of Chemistry journal article supplement (doi:10.1039/d1nr08077f), 2022-01-01
Supplement: d1nr08077f1.pdf [file d1nr08077f1.pdf]

Electronic Supplementary Information for  
Crystal structure dependent cation exchange  
reactions in  $\text{Cu}_{2-x}\text{S}$  nanoparticles

Lihui Chen,<sup>\*a</sup> Zhenzhen Kong,<sup>b</sup> Hengcong Tao,<sup>a</sup> Haifeng Hu,<sup>b</sup> Jing Gao<sup>b</sup> and Guohua Li<sup>\*b</sup>

<sup>a</sup>*School of Petrochemical Engineering & Environment, Zhejiang Ocean University, No.1,  
Haida South Road, Lincheng Changzhi Island, Zhoushan 316022, China*

<sup>b</sup>*College of Chemical Engineering, Zhejiang University of Technology, 18, Chaowang  
Road, Hangzhou 310014, China*

## Chemicals

Copper(I) chloride (CuCl, 99%), cadmium (II) chloride (CdCl<sub>2</sub>, 99%), and 1-octadecene (ODE) were purchased from Sigma-Aldrich. Oleylamine (OAm, 80–90%) was purchased from Acros Organics. 1-dodecanethiol (1-DDT, 98%), crystal sulfur, trioctyl-phosphine (TOP, 98%), ethanol (99.5%), toluene, acetone, chloroform (CHCl<sub>3</sub>) and other chemicals were purchased from Wako Chemicals. All the chemicals were used without any purification.

## Characterizations

TEM observations were carried out using a JEM-1011 (JEOL) transmission electron microscope at an accelerating voltage of 100 kV. HRTEM and STEM images were obtained by using a TEM (Tecnai G2 F30 S-Twin, Philips-FEI, Netherlands) at an acceleration voltage of 300 kV. Elemental distribution/mapping was analyzed using energy dispersive X-ray spectroscopy (EDS) on a Tecnai G2 F30 equipped with an Oxford/INCA EDS. UV/vis/NIR (300 nm-2500 nm) absorption spectra of Cu<sub>2-x</sub>S NDs, CdS NDs, and the according heterostructures were measured in a 1 mm quartz cuvette using U-4100 spectrophotometer (HITACHI). The XRD patterns were taken on X'Pert Pro MPD (PANalytical) with CuK $\alpha$  radiation ( $\lambda = 1.542 \text{ \AA}$ ) at 45 kV and 40 mA. X-ray fluorescence (XRF) analysis was examined with a JSX-3202C (JEOL) instrument at 30 kV and 1 mA. Raman spectra of Cu<sub>2-x</sub>S NDs and CdS NDs were recorded using inVia microscopic spectrometer (Renishaw). Data were obtained at  $\lambda = 532 \text{ nm}$  with a 50 $\times$  objective using a nominal power of 0.25 mW and integration time of 120 s.

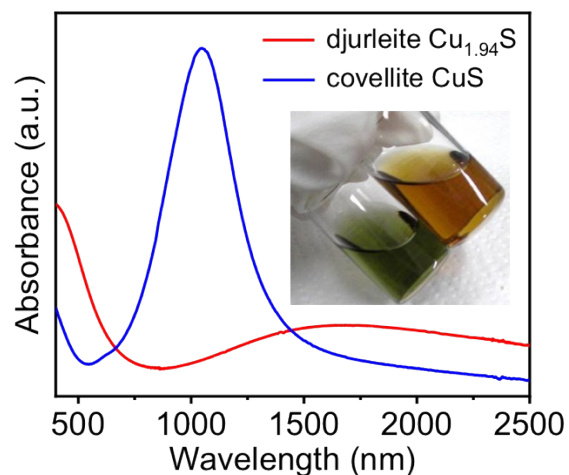

**Figure S1.** UV/vis/NIR absorption spectra of djurleite  $\text{Cu}_{1.94}\text{S}$  NDs and covellite  $\text{CuS}$  NDs.

Inset: digital photograph of  $\text{Cu}_{1.94}\text{S}$  (brownish) and  $\text{CuS}$  (greenish) dispersed in  $\text{CHCl}_3$ .

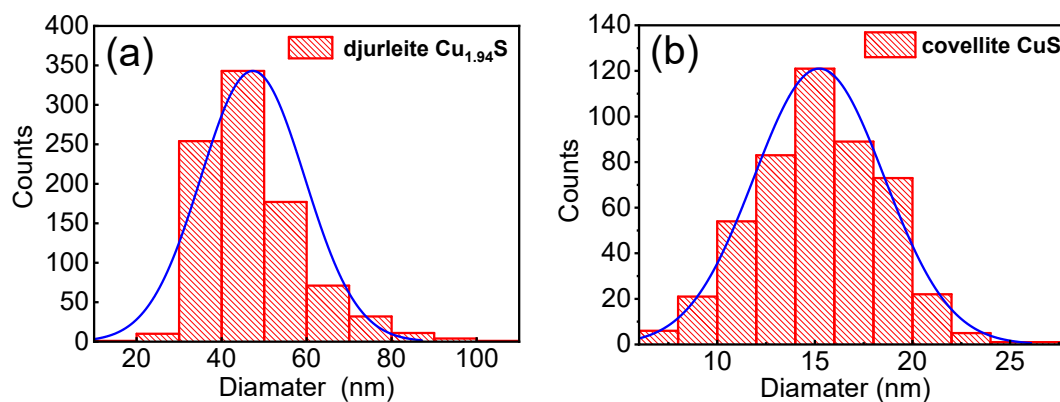

**Figure S2.** Size-distribution histograms of (a) djurleite  $\text{Cu}_{1.94}\text{S}$  and (b) covellite  $\text{CuS}$  NDs.

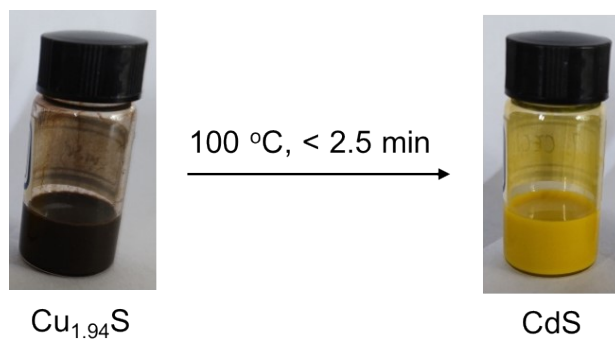

**Figure S3.** Rapid color change from  $\text{Cu}_{1.94}\text{S}$  to  $\text{CdS}$  after full CE reaction.

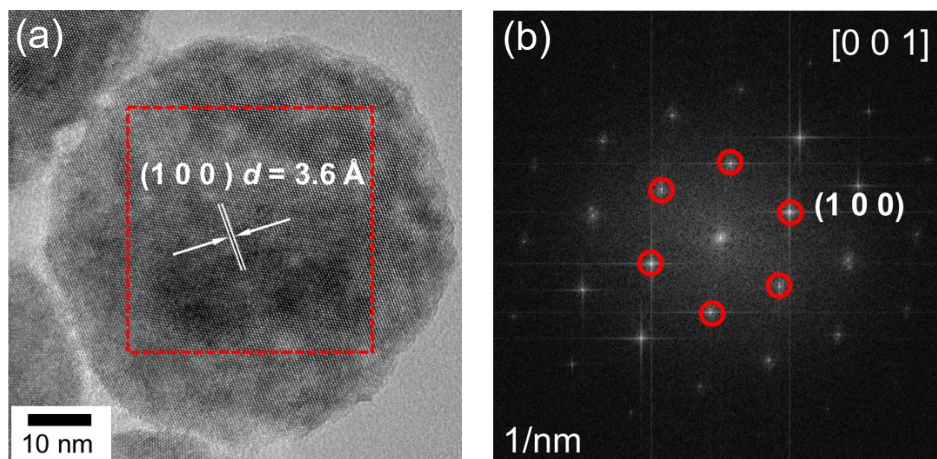

**Figure S4.** (a) HRTEM image of CdS NDs after full CE reaction from djurleite  $\text{Cu}_{1.94}\text{S}$  ND. (b) Fast Fourier transform pattern of the CdS phase viewed from [0 0 1] direction.

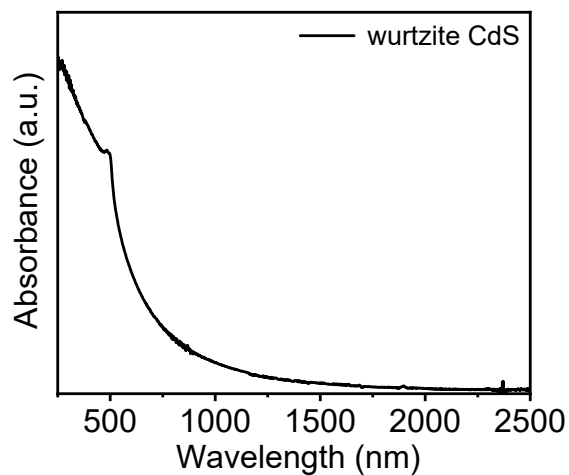

**Figure S5.** UV/vis/NIR absorption spectrum of the resulting CdS NDs. The absorption at longer wavelengths might be ascribed to the contribution from the residual  $\text{Cu}^+$  in CdS NDs.

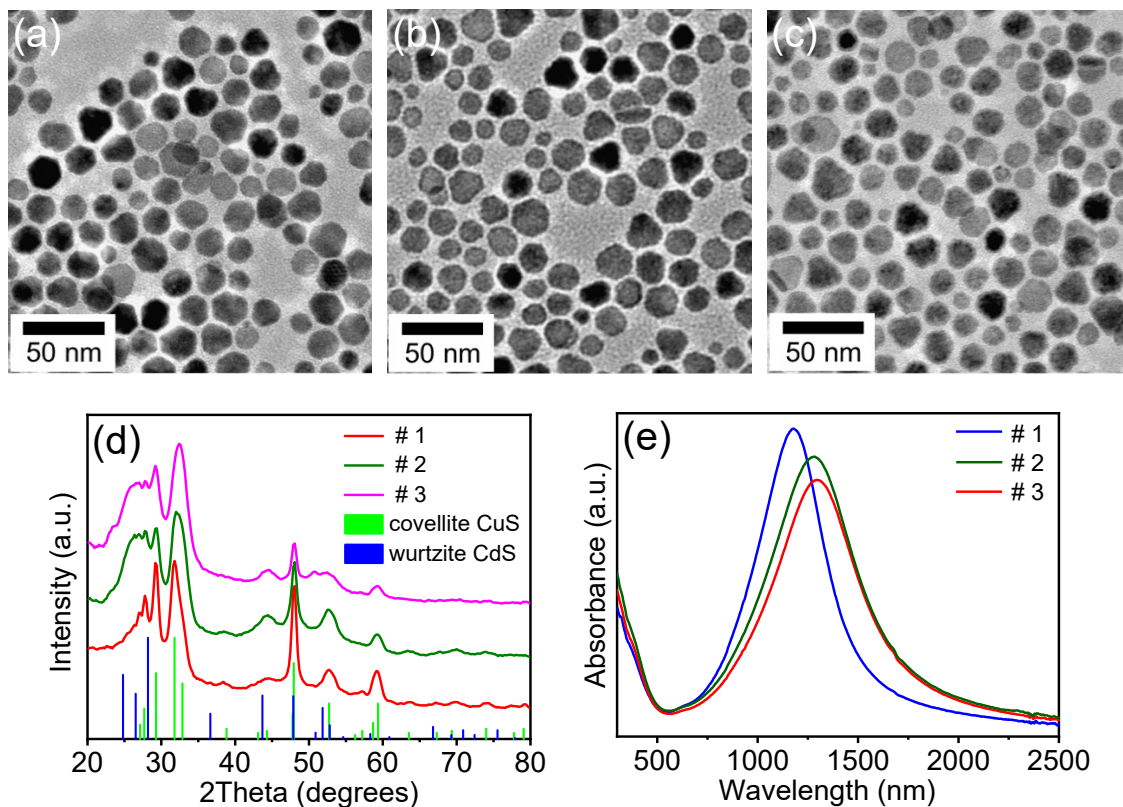

**Figure S6.** (a-c) TEM images of the resulting NDs obtained from CE reactions of covellite CuS with  $\text{Cd}^{2+}$ . Reaction condition for # 1: 0.5 mmol of CuS, 100 °C, 1.0 mmol of  $\text{CdCl}_2$ , 30 min; for # 2: 0.5 mmol of CuS, 100 °C, 1.0 mmol of  $\text{CdCl}_2$ , 180 min; for # 3: 0.5 mmol of CuS, 100 °C, 2.0 mmol of  $\text{CdCl}_2$ , 180 min. (d) XRD patterns and (e) UV/vis/NIR absorption spectra of the corresponding samples.

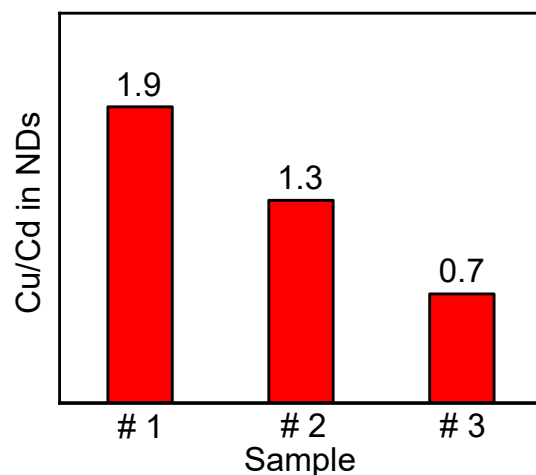

**Figure S7.** Cu/Cd molar ratio in # 1, # 2 and # 3 samples. Under the above reaction conditions, the  $\text{Cu}^+$  in the surface region of covellite CuS NDs is started to be expelled and the ND hosts the incoming  $\text{Cd}^{2+}$  perhaps through a surface adsorption process.

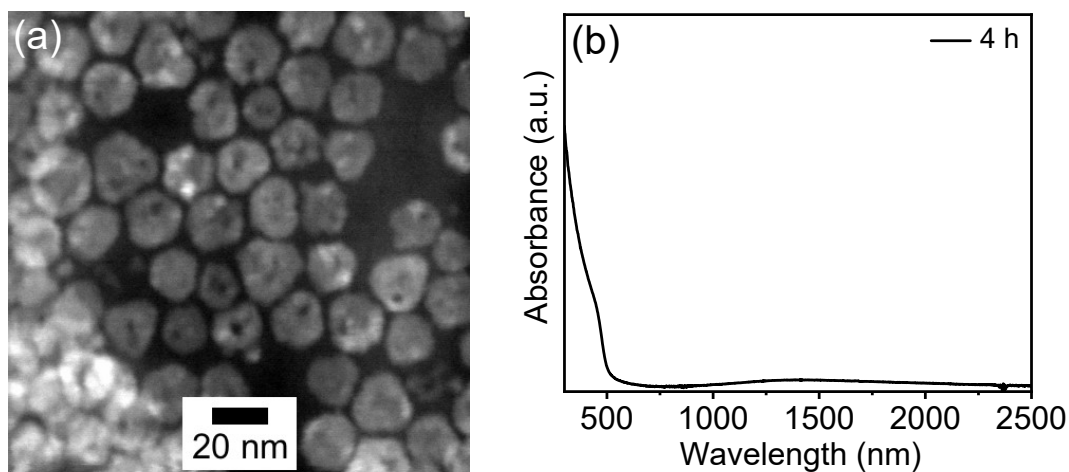

**Figure S8.** (a) Dark-field STEM image and (b) UV/vis/NIR absorption spectrum of the resulting CdS NDs obtained from CE reaction of covellite CuS with  $\text{Cd}^{2+}$  under the reaction condition: 0.5 mmol of CuS, 140 °C, 2.0 mmol of  $\text{CdCl}_2$ , 4 h.

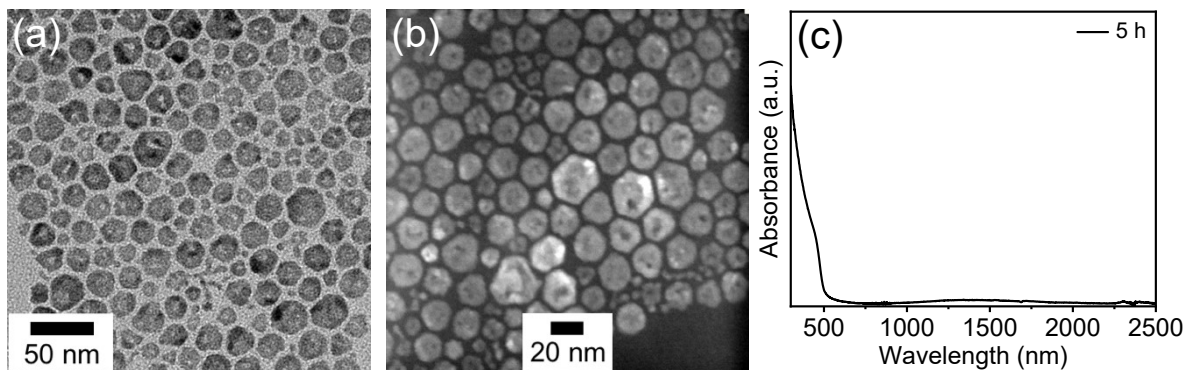

**Figure S9.** (a) Bright-field TEM image, (b) dark-field STEM image and (c) UV/vis/NIR absorption spectrum of the resulting CdS NDs obtained from CE reaction of covellite CuS with  $\text{Cd}^{2+}$  under the reaction condition: 0.5 mmol of CuS, 140 °C, 2.0 mmol of  $\text{CdCl}_2$ , 5 h.

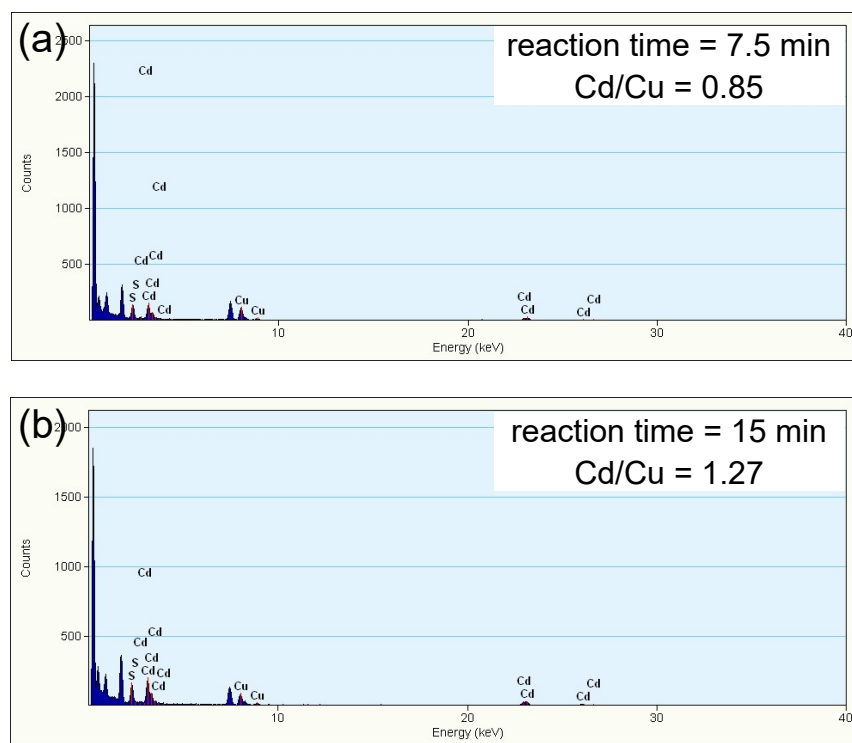

**Figure S10.** EDS spectrum of  $\text{Cu}_{1.94}\text{S}/\text{CdS}$  heterostructured NDs obtained under the reaction condition:  $\text{Cu}_{1.94}\text{S}$  (containing 0.5 mmol  $\text{Cu}^+$ ), 80 °C, 1.0 mmol of  $\text{CdCl}_2$ , (a) 7.5 min, and (b) 15 min.

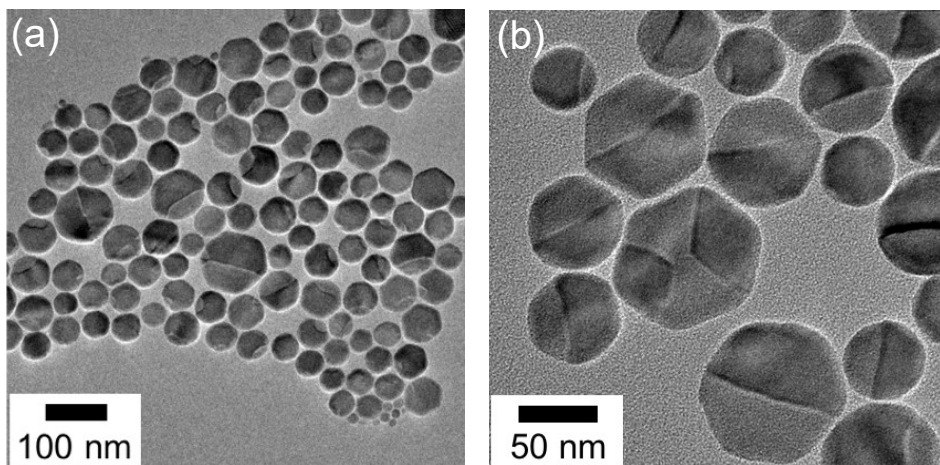

**Figure S11.** (a, b) Bright-field TEM images of  $\text{Cu}_{1.94}\text{S}/\text{CdS}$  NDs obtained under the reaction condition:  $\text{Cu}_{1.94}\text{S}$  (containing 0.5 mmol  $\text{Cu}^+$ ), 80 °C, 1.0 mmol of  $\text{CdCl}_2$ , 15 min.

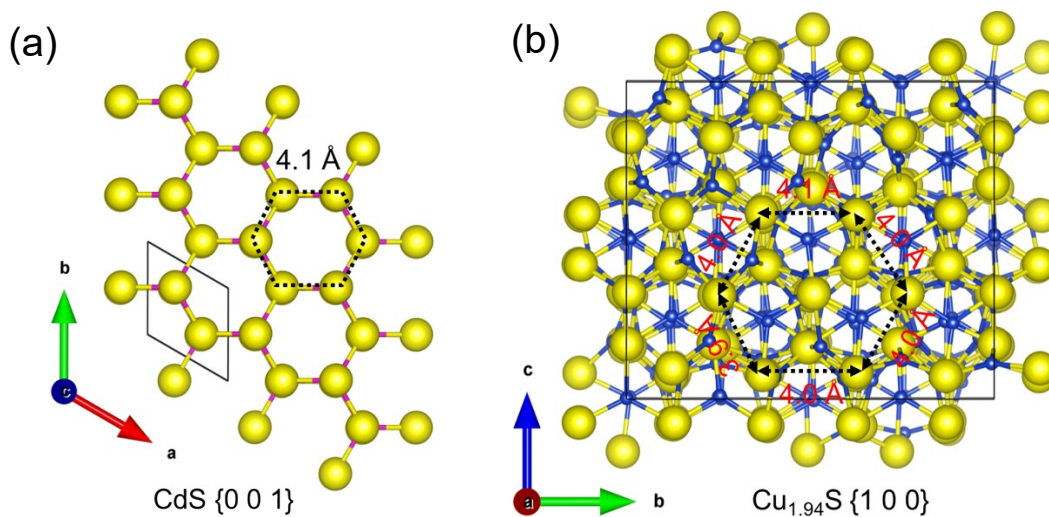

**Figure S12.** Distance between S-S sublayers in (a)  $\text{CdS}$   $\{0\ 0\ 1\}$  and (b)  $\text{Cu}_{1.94}\text{S}$   $\{1\ 0\ 0\}$ .

Yellow sphere: sulfur atom, pink sphere: cadmium atom, blue sphere: copper atom.



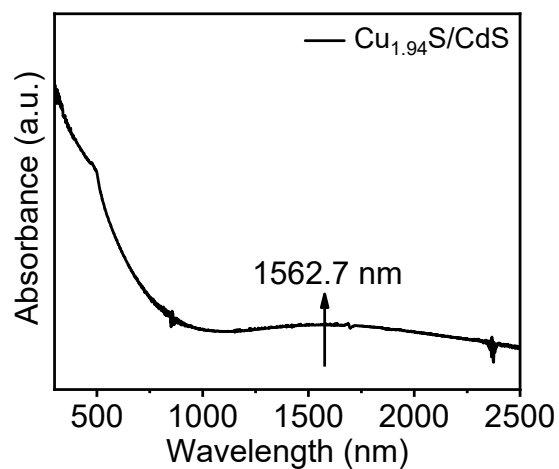

**Figure S13.** UV/vis/NIR absorption spectrum of  $\text{Cu}_{1.94}\text{S}/\text{CdS}$  heterostructured NDs.

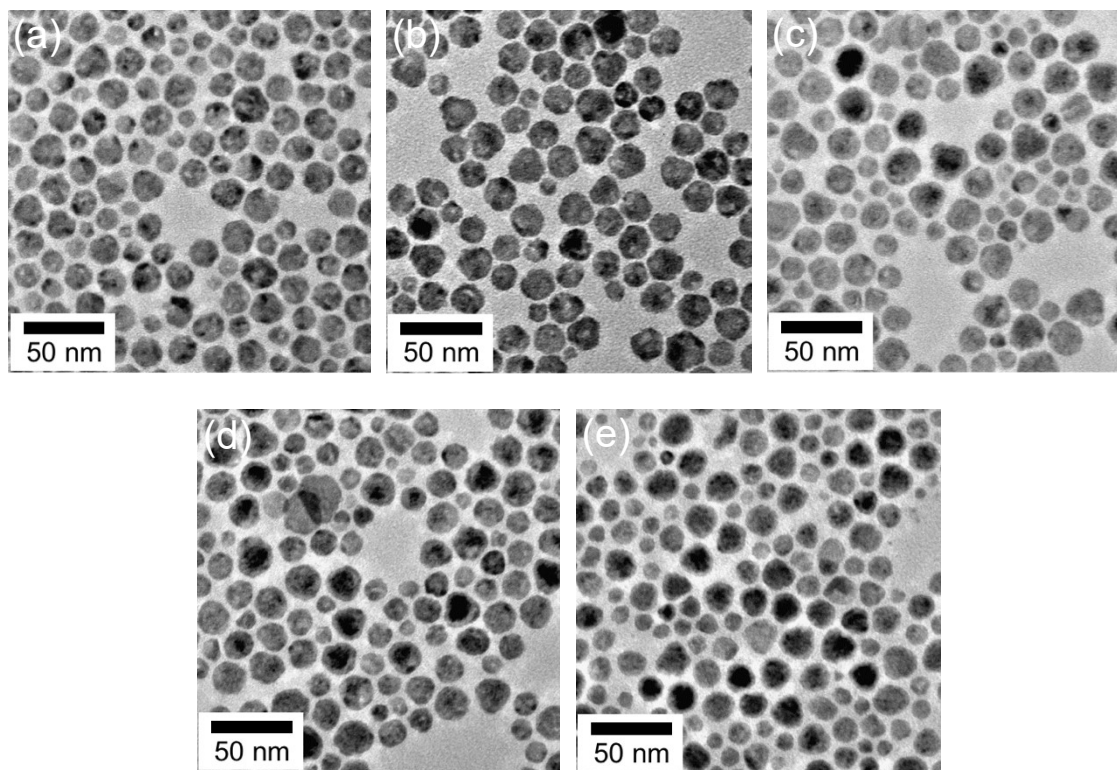

**Figure S14.** TEM images of the resulting  $\text{CuS}@\text{CdS}$  NDs obtained from CE reactions of  $\text{CuS}$  with  $\text{Cd}^{2+}$  under the reaction condition: 0.5 mmol of  $\text{CuS}$ , 140 °C, 2.0 mmol of  $\text{CdCl}_2$  and the reaction time of (a) 180 min, (b) 60 min, (c) 40 min, (d) 20 min and (e) 10 min.

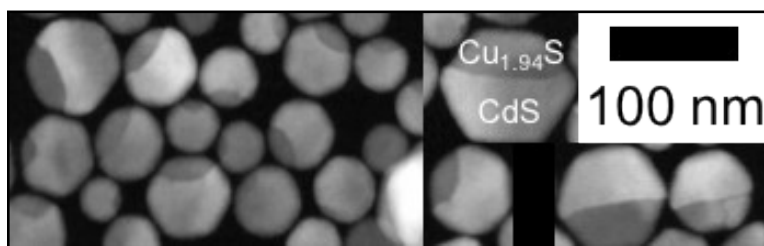

**Figure S15.** Dark-field STEM image of Janus-type  $\text{Cu}_{1.94}\text{S}/\text{CdS}$  NDs. In spite of quite different particle size of starting  $\text{Cu}_{1.94}\text{S}$  NDs, the formation of  $\text{Cu}_{1.94}\text{S}/\text{CdS}$  is particle size independent and no core@shell nanostructure is observed.

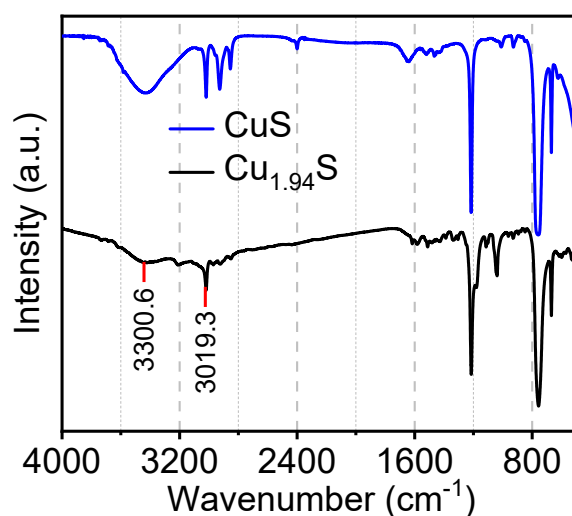

**Figure S16.** FTIR spectra of djurleite  $\text{Cu}_{1.94}\text{S}$  NDs and covellite  $\text{CuS}$  NDs. The peak located at about  $3300\text{ cm}^{-1}$ ,  $3019\text{ cm}^{-1}$  is assigned to  $\nu_{\text{as}}(\text{NH}_2)/\nu_{\text{s}}(\text{NH}_2)$  and  $\delta(\text{=C-H})$ , respectively.  $\nu_{\text{as}}$  = asymmetric stretching vibration,  $\nu_{\text{s}}$  = symmetric stretching vibration, and  $\delta$  = bending vibration.

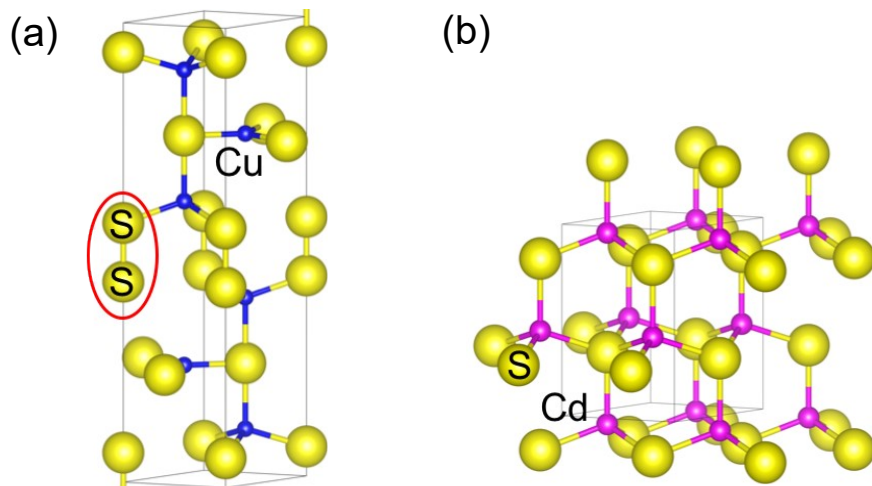

**Figure S17.** Unit cell of (a) covellite CuS and (b) wurtzite CdS.

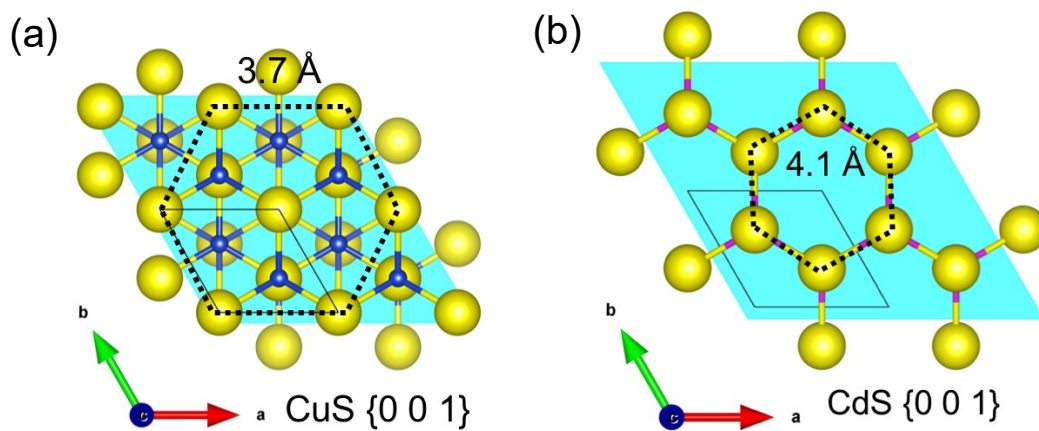

**Figure 18.** S-S distance in (a) CuS  $\{0\ 0\ 1\}$  and (b) CdS  $\{0\ 0\ 1\}$ . The mismatch of S-S distance in hexagonal sulfur sublattices is 9.8%. Yellow sphere: sulfur atom, pink sphere: cadmium atom, blue sphere: copper atom.
